# Supplementary material
Source: PubMed Central journal article supplement (PMC2556806)
Supplement: pp.108.125690_2.pdf [file pp.108.125690_2.pdf]

## Supp. Figure 2

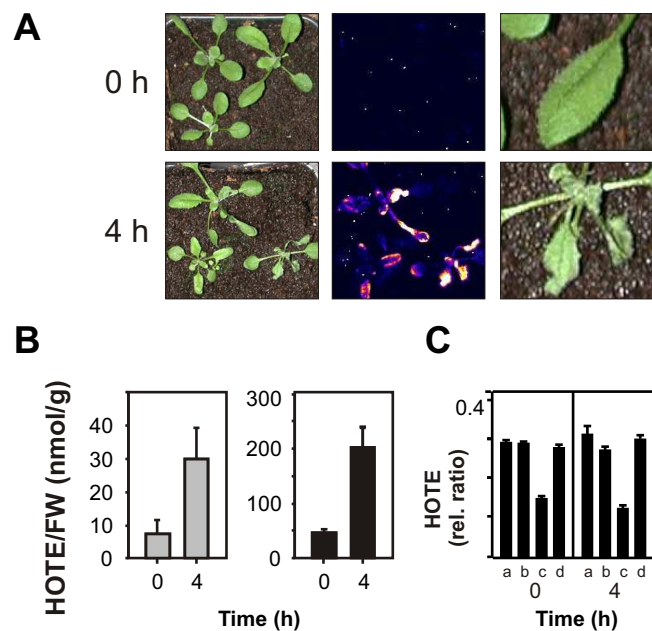

### Supplementary Figure S2: Photo-oxidation of the *flu A. thaliana* mutant.

*Flu* plants were grown under continuous light conditions ( $100 \mu\text{mole m}^{-2}\text{s}^{-1}$ ) for 3 weeks. After 10 h in the dark plants were back transferred into light at time 0 h to induce accumulation of protochlorophyllides and  $^1\text{O}_2$  (Przybyla et al., 2008). A, images of plants just after the dark/light shift (0 h) and 4 h later; left panels: photography of the plants; central panels: autoluminescence measurement (Havaux et al., 2006) reflecting LPO; right panels, example of damage development on leaf. B, ROS-mediated LPO expressed as total non-enzymatic HOTE levels (grey bars) and enzymatic 13-HOTE levels (black bars) according to (Montillet et al., 2004). C, HOTE signatures (for details see Fig. 1) indicating the occurrence of  $^1\text{O}_2$ -mediated LPO at time 0 and 4 h. Results are expressed as mean  $\pm$  SD ( $n=3$ ).
