# Supplementary material
Source: PubMed Central journal article supplement (PMC2556806)
Supplement: pp.108.125690_3.pdf [file pp.108.125690_3.pdf]

**Supplementary Table S1** : Mass transitions and conditions for negative electrospray ionization HPLC-MS/MS analysis of phytoprostane-F<sub>1</sub> and of the hydroxy fatty acids issued from the oxidation of linoleic (18:2) and linolenic (18:3) acids.

Lipids were analysed with a Waters Micromass Quatro Premier triple quadrupole mass spectrometer (Milford, MA, USA) in the negative ESI mode with a capillary voltage of 3 kV. The source was set at 120°C and N<sub>2</sub> was used as desolvation gas with a flow of 800L/h at 350°C. Argon was used for collision-induced dissociation (flow rate of 0.3 mL/min, 3 x 10<sup>-3</sup> mBar) The cone voltage and collision energy were optimized for all compounds and selected mass transitions were monitored. For HFA analyses, response factors were determined by injection of a mixture of HFA, obtained by methylene blue catalysed photo-oxidation of free 18:3 (18:2), with a composition determined both by HPLC-UV and full scan HPLC-MS. See Supplementary Figure 1 and text footnotes for abbreviations; PPF<sub>1</sub>, phytoprostane-F<sub>1</sub> (22).

| Compound                                           | Precursor ion<br>( <i>m/z</i> ) | Product ion<br>( <i>m/z</i> ) | Cone voltage<br>(V) | Collision energy<br>(eV) |
|----------------------------------------------------|---------------------------------|-------------------------------|---------------------|--------------------------|
| PPF <sub>1</sub> -I                                | 327                             | 225                           | 41                  | 26                       |
| PPF <sub>1</sub> -II                               | 327                             | 171                           | 41                  | 26                       |
| <sup>18</sup> O <sub>3</sub> -PPF <sub>1</sub> -I  | 333                             | 227                           | 41                  | 26                       |
| <sup>18</sup> O <sub>3</sub> -PPF <sub>1</sub> -II | 333                             | 173                           | 41                  | 26                       |
|                                                    |                                 |                               |                     |                          |
| 9-HODE                                             | 295                             | 123                           | 26                  | 20                       |
| 9-HODE                                             | 295                             | 171                           | 26                  | 20                       |
| 10-HODE                                            | 295                             | 155                           | 26                  | 20                       |
| 10/12-HODE                                         | 295                             | 183                           | 26                  | 20                       |
| 12-HODE                                            | 295                             | 211                           | 26                  | 20                       |
| 13-HODE                                            | 295                             | 195                           | 26                  | 20                       |
| 13-HODE                                            | 295                             | 225                           | 26                  | 20                       |
| <sup>18</sup> O <sub>2</sub> -13-HODE              | 299                             | 199                           | 26                  | 20                       |
| <sup>18</sup> O <sub>2</sub> -13-HODE              | 299                             | 229                           | 26                  | 20                       |
|                                                    |                                 |                               |                     |                          |
| 9-HOTE                                             | 293                             | 121                           | 26                  | 20                       |
| 9-HOTE                                             | 293                             | 171                           | 26                  | 20                       |
| 10-HOTE                                            | 293                             | 155                           | 26                  | 20                       |
| 10/12-HOTE                                         | 293                             | 183                           | 26                  | 20                       |
| 12-HOTE                                            | 293                             | 211                           | 26                  | 20                       |
| 13-HOTE                                            | 293                             | 195                           | 26                  | 20                       |
| 13/15-HOTE                                         | 293                             | 223                           | 26                  | 20                       |
| 16-HOTE                                            | 293                             | 235                           | 26                  | 20                       |
| <sup>18</sup> O <sub>2</sub> -13-HOTE              | 297                             | 223                           | 26                  | 20                       |
| <sup>18</sup> O <sub>2</sub> -13-HOTE              | 297                             | 227                           | 26                  | 20                       |
| 15-HEDE                                            | 323                             | 113                           | 26                  | 20                       |
| 15-HEDE                                            | 323                             | 223                           | 26                  | 20                       |
