# Supplementary material
Source: PubMed Central journal article supplement (PMC2556806)
Supplement: pp.108.125690_4.pdf [file pp.108.125690_4.pdf]

**Supplementary Table S2:** Primers and universal probe library probes (Roche Applied Science) that were used in the Q-PCR reactions.

All primers were designed using the on-line Assay Design Center (Roche Applied Science). Marker genes were selected on the basis of references 14 and 23. All PCR reactions were performed in triplicate and on material from 2 different experiments. Data were analysed using qBase [version 1.3.5; Hellemans et al. (2007) *Genome Biol.* 8: R19]. All transcript levels were normalised using actin-related protein 7 (at3g60830) as a control gene.

**H<sub>2</sub>O<sub>2</sub>-specific genes**

|           |                         | bp  | PL#<br>Roche | Left primer              | Right primer            | amplicon |
|-----------|-------------------------|-----|--------------|--------------------------|-------------------------|----------|
| at1g49150 | unknown protein         | 447 | 77           | gccgttttggtactctgtc      | gaccaccgacgaaaagacc     | 60       |
| at1g62380 | ACC oxidase 2<br>(ACO2) | 963 | 73           | cagatgtgtctgatgaatacagga | ccctagattctcacagtagatcc | 101      |

**<sup>1</sup>O<sub>2</sub>-specific genes**

|           |                                                | bp  | PL#<br>Roche | Left primer          | Right primer          | amplicon |
|-----------|------------------------------------------------|-----|--------------|----------------------|-----------------------|----------|
| at5g10830 | putative embryo-abundant protein<br>(EAP-like) | 786 | 87           | ctgatctcaccgatcaccac | tctcgtaatgctctgcaacg  | 87       |
| at3g61190 | BAP1                                           | 579 | 152          | taaaccggagaccatcaag  | tcgacatttctctgctgattt | 62       |

**control**

|           |                                | bp   | PL#<br>Roche | Left primer          | Right primer         | amplicon |
|-----------|--------------------------------|------|--------------|----------------------|----------------------|----------|
| at3g60830 | actin-like protein 7<br>(ARP7) | 1092 | 147          | actcttctgatggacaggtg | ctcaacgattccatgctcct | 108      |
